# Supplementary material
Source: HighWire-hosted journal article supplement (https://bmjopen.bmj.com/content/7/12/e017668)
Supplement: inline-supplementary-material-3 [file inline-supplementary-material-3.pdf]

## SMART-India Weekly Report

**Weekly Report:** Week of

Village # and Name:

Research Coordinators:

| <b>Recruitment Report</b>                                                                                               |                    |                |                 |                    |                |                 |
|-------------------------------------------------------------------------------------------------------------------------|--------------------|----------------|-----------------|--------------------|----------------|-----------------|
|                                                                                                                         | <b>Male</b>        |                |                 | <b>Female</b>      |                |                 |
| <b>Age</b>                                                                                                              | <b>Approached*</b> | <b>Refused</b> | <b>Enrolled</b> | <b>Approached*</b> | <b>Refused</b> | <b>Enrolled</b> |
| <b>40-55</b>                                                                                                            |                    |                |                 |                    |                |                 |
| <b>56-65</b>                                                                                                            |                    |                |                 |                    |                |                 |
| <b>65+</b>                                                                                                              |                    |                |                 |                    |                |                 |
| <b>Total</b>                                                                                                            |                    |                |                 |                    |                |                 |
| % Response Rate (overall)(enrolled/approached) x 100:<br>% Response Rate (refusal) (enrolled/(enrolled+refused)) x 100: |                    |                |                 |                    |                |                 |
| * Includes not available + refused                                                                                      |                    |                |                 |                    |                |                 |

| <b>Alivecor Results</b> |               |                     |                    |
|-------------------------|---------------|---------------------|--------------------|
|                         | <b>Normal</b> | <b>Inconclusive</b> | <b>AF-Positive</b> |
| <b>Total</b>            |               |                     |                    |

| <b>Number of Screenings Completed</b> |          |          |
|---------------------------------------|----------|----------|
| <b>3</b>                              | <b>2</b> | <b>1</b> |
|                                       |          |          |
